# Supplementary material for: Upregulation of flotillin-1 promotes invasion and metastasis by activating TGF-β signaling in nasopharyngeal carcinoma
Source: PubMed Central journal article supplement (PMC4826203; doi:10.18632/oncotarget.6483), 2015-12-07
Supplement: oncotarget-07-4252-s001.pdf [file oncotarget-07-4252-s001.pdf]

## Upregulation of flotillin-1 promotes invasion and metastasis by activating TGF- $\beta$ signaling in nasopharyngeal carcinoma

### Supplementary Materials

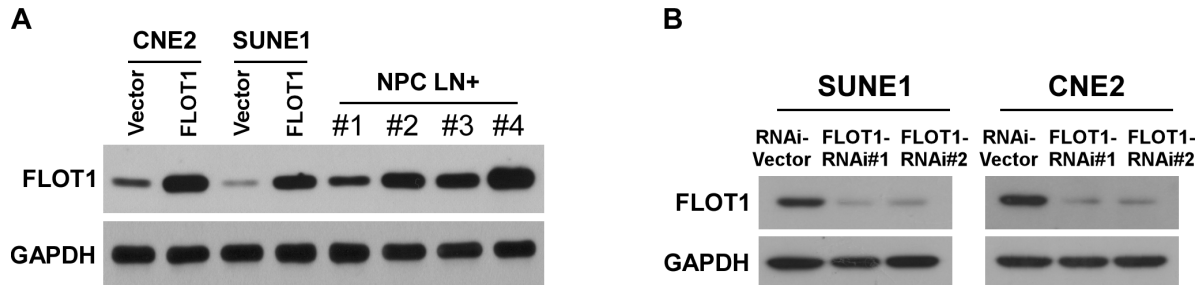

Supplementary Figure S1: Western blot analysis of FLOT1 in Vector control cells and FLOT1-transduced cells as well as 4 NPC LN+ tissues, or RNAi-vector control cells and FLOT1-silenced cells. GAPDH was used as a loading control.

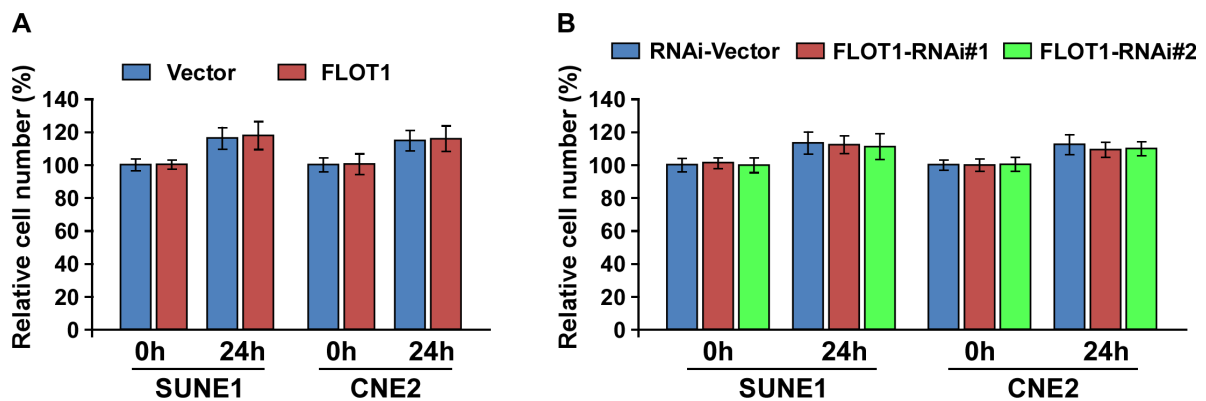

Supplementary Figure S2: The cell proliferation assay showed that neither FLOT1 overexpression (A) nor silencing (B) significantly change NPC cell numbers compared to controls within 24 h.

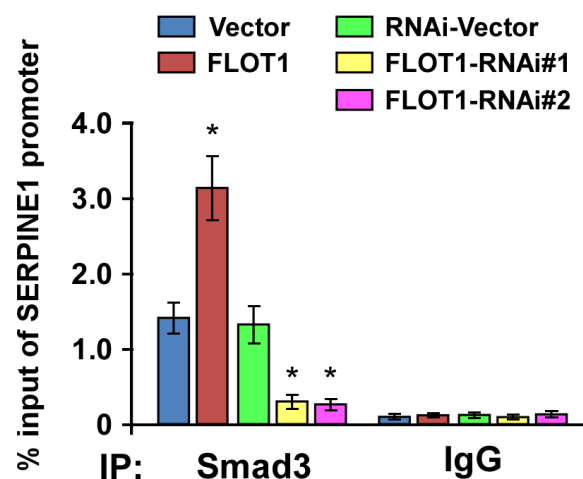

Supplementary Figure S3: ChIP assay revealed that the binding efficacy of Smad3 on SERPINE1 promoter was significantly increased in FLOT1-overexpressing CNE2 cells but decreased in FLOT1-silenced cells. \* $P < 0.05$ .

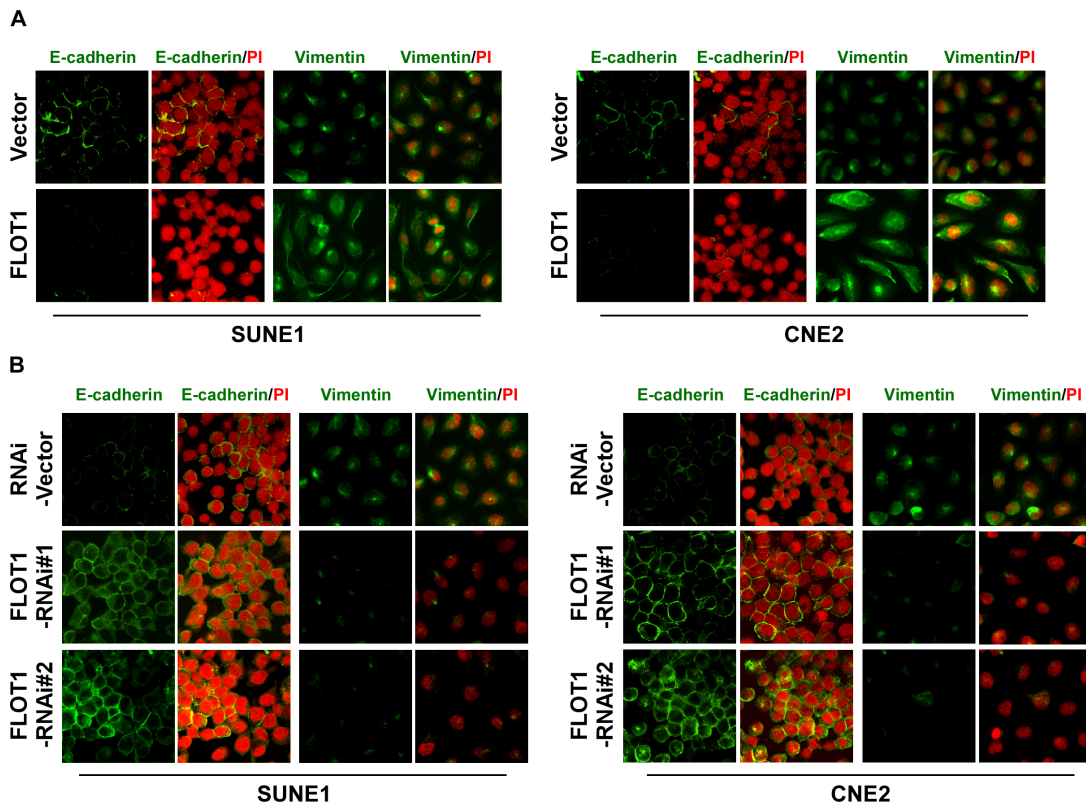

**Supplementary Figure S4: FLOT1 overexpression facilitated, while silencing FLOT1 abrogated TGF- $\beta$ -induced EMT in SUNE1 and CNE2 cells.** (A and B) Fluorescent immunostaining of E-cadherin, Vimentin and Propidium iodide (PI) in the FLOT1-overexpressing (A) and FLOT1-silenced (B) NPC cells compared to controls. The green signal represents staining for E-cadherin or Vimentin, while the red signal signifies nuclear DNA staining with Propidium iodide.

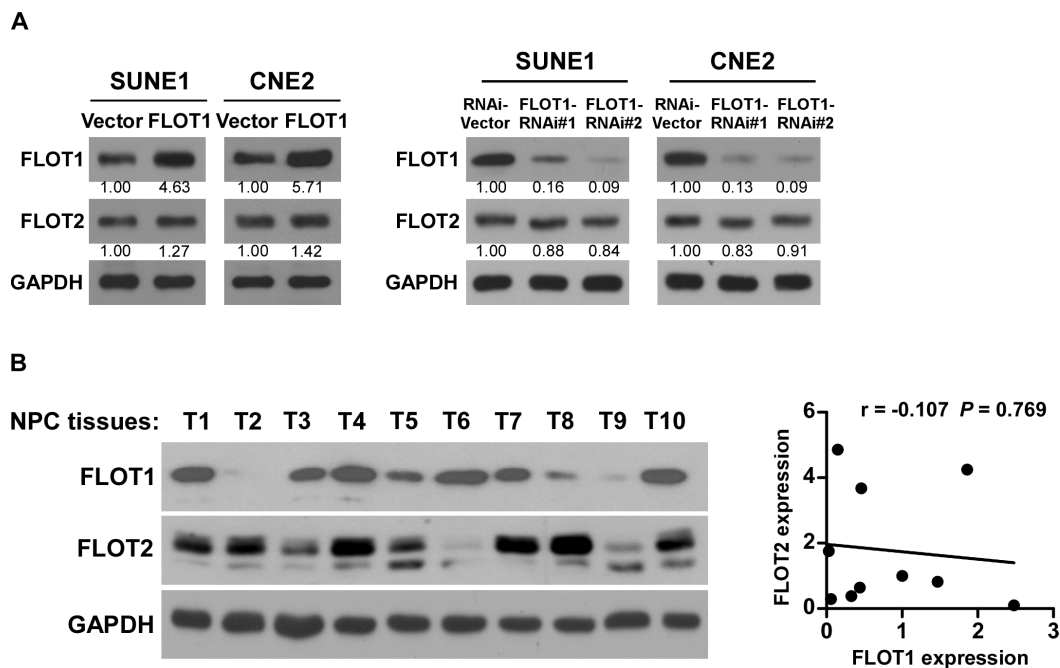

**Supplementary Figure S5: (A)** Western blotting analysis of FLOT2 in the FLOT1-overexpressing and FLOT1-silenced cells compared to controls. **(B)** Expression analysis (left) and correlation (right) of FLOT1 expression and FLOT2 protein expression in ten freshly collected human NPC tissue samples (T). The ratio of first sample T1 (FLOT1/GAPDH and FLOT2/GAPDH) was considered as 1.0. GAPDH was used as a loading control.

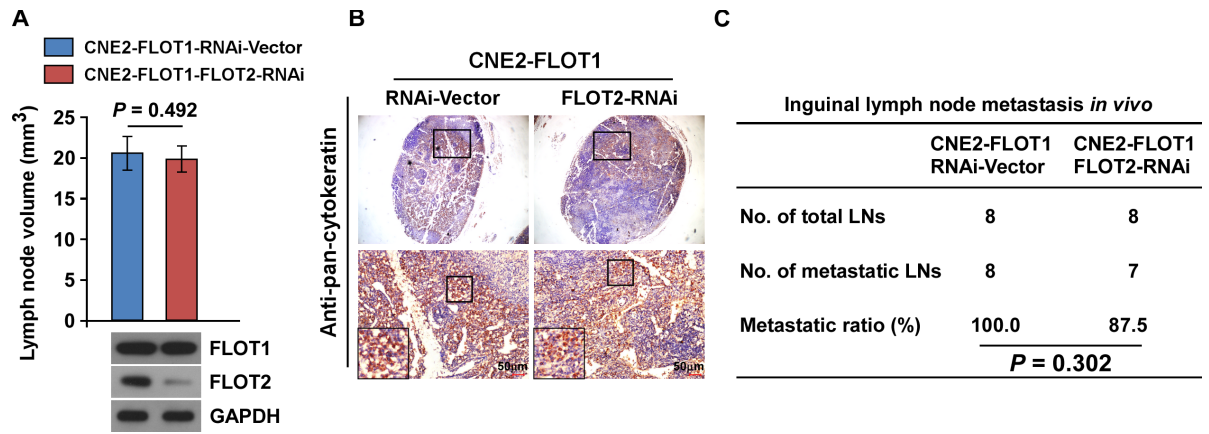

**Supplementary Figure S6: FLOT1 promoted lymph node metastasis independent of FLOT2 in NPC.** (A) The average volumes of inguinal lymph nodes in each group. (B) Representative micrographs of the inguinal lymph nodes immunostained with an anti-pan-cytokeratin antibody. Scale bars: 50 μm. (C) The ratios of metastatic to total dissected inguinal lymph nodes from mice inoculated with the indicated cells, the Chi-square test was used for statistical analysis. Error bars represent mean ± SD.

**Supplementary Table S1: Clinicopathological characteristics of studied patients and expression of FLOT1 in NPC**

| <b>Factor</b>                        | <b>NO.</b> | <b>(%)</b> |
|--------------------------------------|------------|------------|
| <b>Gender</b>                        |            |            |
| Male                                 | 126        | 74.6       |
| Female                               | 43         | 25.4       |
| <b>Age (years)</b>                   |            |            |
| ≤ 45                                 | 86         | 50.9       |
| > 45                                 | 83         | 49.1       |
| <b>WHO histologic classification</b> |            |            |
| NKUC                                 | 115        | 68.0       |
| NKDC                                 | 51         | 30.2       |
| KSCC                                 | 3          | 1.8        |
| <b>Clinical stage</b>                |            |            |
| I                                    | 13         | 7.7        |
| II                                   | 40         | 23.7       |
| III                                  | 67         | 39.6       |
| IVa-b                                | 49         | 29.0       |
| <b>N classification</b>              |            |            |
| N <sub>0</sub>                       | 57         | 33.7       |
| N <sub>1</sub>                       | 72         | 42.6       |
| N <sub>2</sub>                       | 32         | 18.9       |
| N <sub>3</sub>                       | 8          | 4.8        |
| <b>T classification</b>              |            |            |
| T <sub>1</sub>                       | 28         | 16.6       |
| T <sub>2</sub>                       | 47         | 27.8       |
| T <sub>3</sub>                       | 69         | 40.8       |
| T <sub>4</sub>                       | 25         | 14.8       |
| <b>VCA-IgA</b>                       |            |            |
| < 1:80                               | 26         | 15.4       |

|                                   |     |      |
|-----------------------------------|-----|------|
| ≥ 1:80                            | 143 | 84.6 |
| <b>EA-IgA</b>                     |     |      |
| < 1:10                            | 40  | 23.7 |
| ≥ 1:10                            | 129 | 76.3 |
| <b>Recurrence or uncontrolled</b> |     |      |
| NO                                | 100 | 59.2 |
| Yes                               | 69  | 40.8 |
| <b>Vital status</b>               |     |      |
| Alive                             | 117 | 69.2 |
| Dead                              | 52  | 30.8 |
| <b>Expression of FLOT1</b>        |     |      |
| Low expression                    | 70  | 41.4 |
| High expression                   | 99  | 58.6 |
|                                   |     |      |

KSCC, keratinizing squamous cell carcinoma; NKDC, nonkeratinizing differentiated carcinoma; NKUC, nonkeratinizing undifferentiated carcinoma.

**Supplementary Table S2: Univariate analysis of different prognostic parameters in patients with NPC**

| Factor                               | No. patients | Mean survival (months) | Hazard ratio | 95% CI      | P-Value |
|--------------------------------------|--------------|------------------------|--------------|-------------|---------|
| <b>Expression of FLOT1</b>           |              |                        |              |             |         |
| Low expression                       | 70           | 80.1                   | 1.0          | Reference   |         |
| High expression                      | 99           | 62.8                   | 2.631        | 1.403–4.933 | 0.003   |
| <b>Gender</b>                        |              |                        |              |             |         |
| Male                                 | 126          | 69.5                   | 1.0          | Reference   |         |
| Female                               | 43           | 73.3                   | 0.755        | 0.388–1.469 | 0.407   |
| <b>Age (years)</b>                   |              |                        |              |             |         |
| ≤ 45                                 | 86           | 75.5                   | 1.0          | Reference   |         |
| > 45                                 | 83           | 65.5                   | 1.778        | 1.020–3.099 | 0.042   |
| <b>WHO histologic classification</b> |              |                        |              |             |         |
| NKDC/KSCC                            | 54           | 71.8                   | 1.0          | Reference   |         |
| NKUC                                 | 115          | 70.2                   | 1.126        | 0.624–2.029 | 0.694   |
| <b>Clinical stage</b>                |              |                        |              |             |         |
| I–II                                 | 53           | 79.2                   | 1.0          | Reference   |         |
| III–IV                               | 116          | 66.9                   | 2.164        | 1.076–4.277 | 0.030   |
| <b>N classification</b>              |              |                        |              |             |         |
| N <sub>0</sub>                       | 57           | 82.2                   | 1.0          | Reference   |         |
| N <sub>1-3</sub>                     | 112          | 65.2                   | 2.771        | 1.350–5.686 | 0.005   |
| <b>T classification</b>              |              |                        |              |             |         |
| T <sub>1-2</sub>                     | 75           | 71.9                   | 1.0          | Reference   |         |
| T <sub>3-4</sub>                     | 94           | 69.8                   | 1.101        | 0.635–1.910 | 0.731   |
| <b>VCA-IgA</b>                       |              |                        |              |             |         |
| < 1:80                               | 26           | 74.3                   | 1.0          | Reference   |         |
| ≥ 1:80                               | 143          | 69.7                   | 1.481        | 0.632–3.470 | 0.366   |
| <b>EA-IgA</b>                        |              |                        |              |             |         |
| < 1:10                               | 40           | 74.5                   | 1.0          | Reference   |         |
| ≥ 1:10                               | 129          | 69.0                   | 1.652        | 0.778–3.510 | 0.192   |

**Supplementary Table S3: Multivariate analysis of different prognostic parameters in patients with NPC**

| <b>Factor</b>              | <b>Hazard ratio</b> | <b>95% CI</b> | <b>P-Value</b> |
|----------------------------|---------------------|---------------|----------------|
| <b>Expression of FLOT1</b> |                     |               |                |
| Low expression             | 1.0                 | Reference     |                |
| High expression            | 2.089               | 1.099–3.968   | 0.024          |
| <b>Age (years)</b>         |                     |               |                |
| ≤ 45                       | 1.0                 | Reference     |                |
| > 45                       | 1.169               | 0.628–2.177   | 0.622          |
| <b>Clinical stage</b>      |                     |               |                |
| I–II                       | 1.0                 | Reference     |                |
| III–IV                     | 1.772               | 0.881–3.562   | 0.109          |
| <b>N classification</b>    |                     |               |                |
| N <sub>0</sub>             | 1.0                 | Reference     |                |
| N <sub>1-3</sub>           | 2.347               | 1.002–5.498   | 0.049          |
